# Supplementary material for: Loss of STIM2 in colorectal cancer drives growth and metastasis through metabolic reprogramming and PERK-ATF4 endoplasmic reticulum stress pathway
Source: PubMed Central journal article supplement — bioRxiv. 2023 Oct 3:2023.10.02.560521. Preprint. [Version 1] doi: 10.1101/2023.10.02.560521 (PMC10592933; doi:10.1101/2023.10.02.560521), 2023-10-03

# Supplementary Figure 1

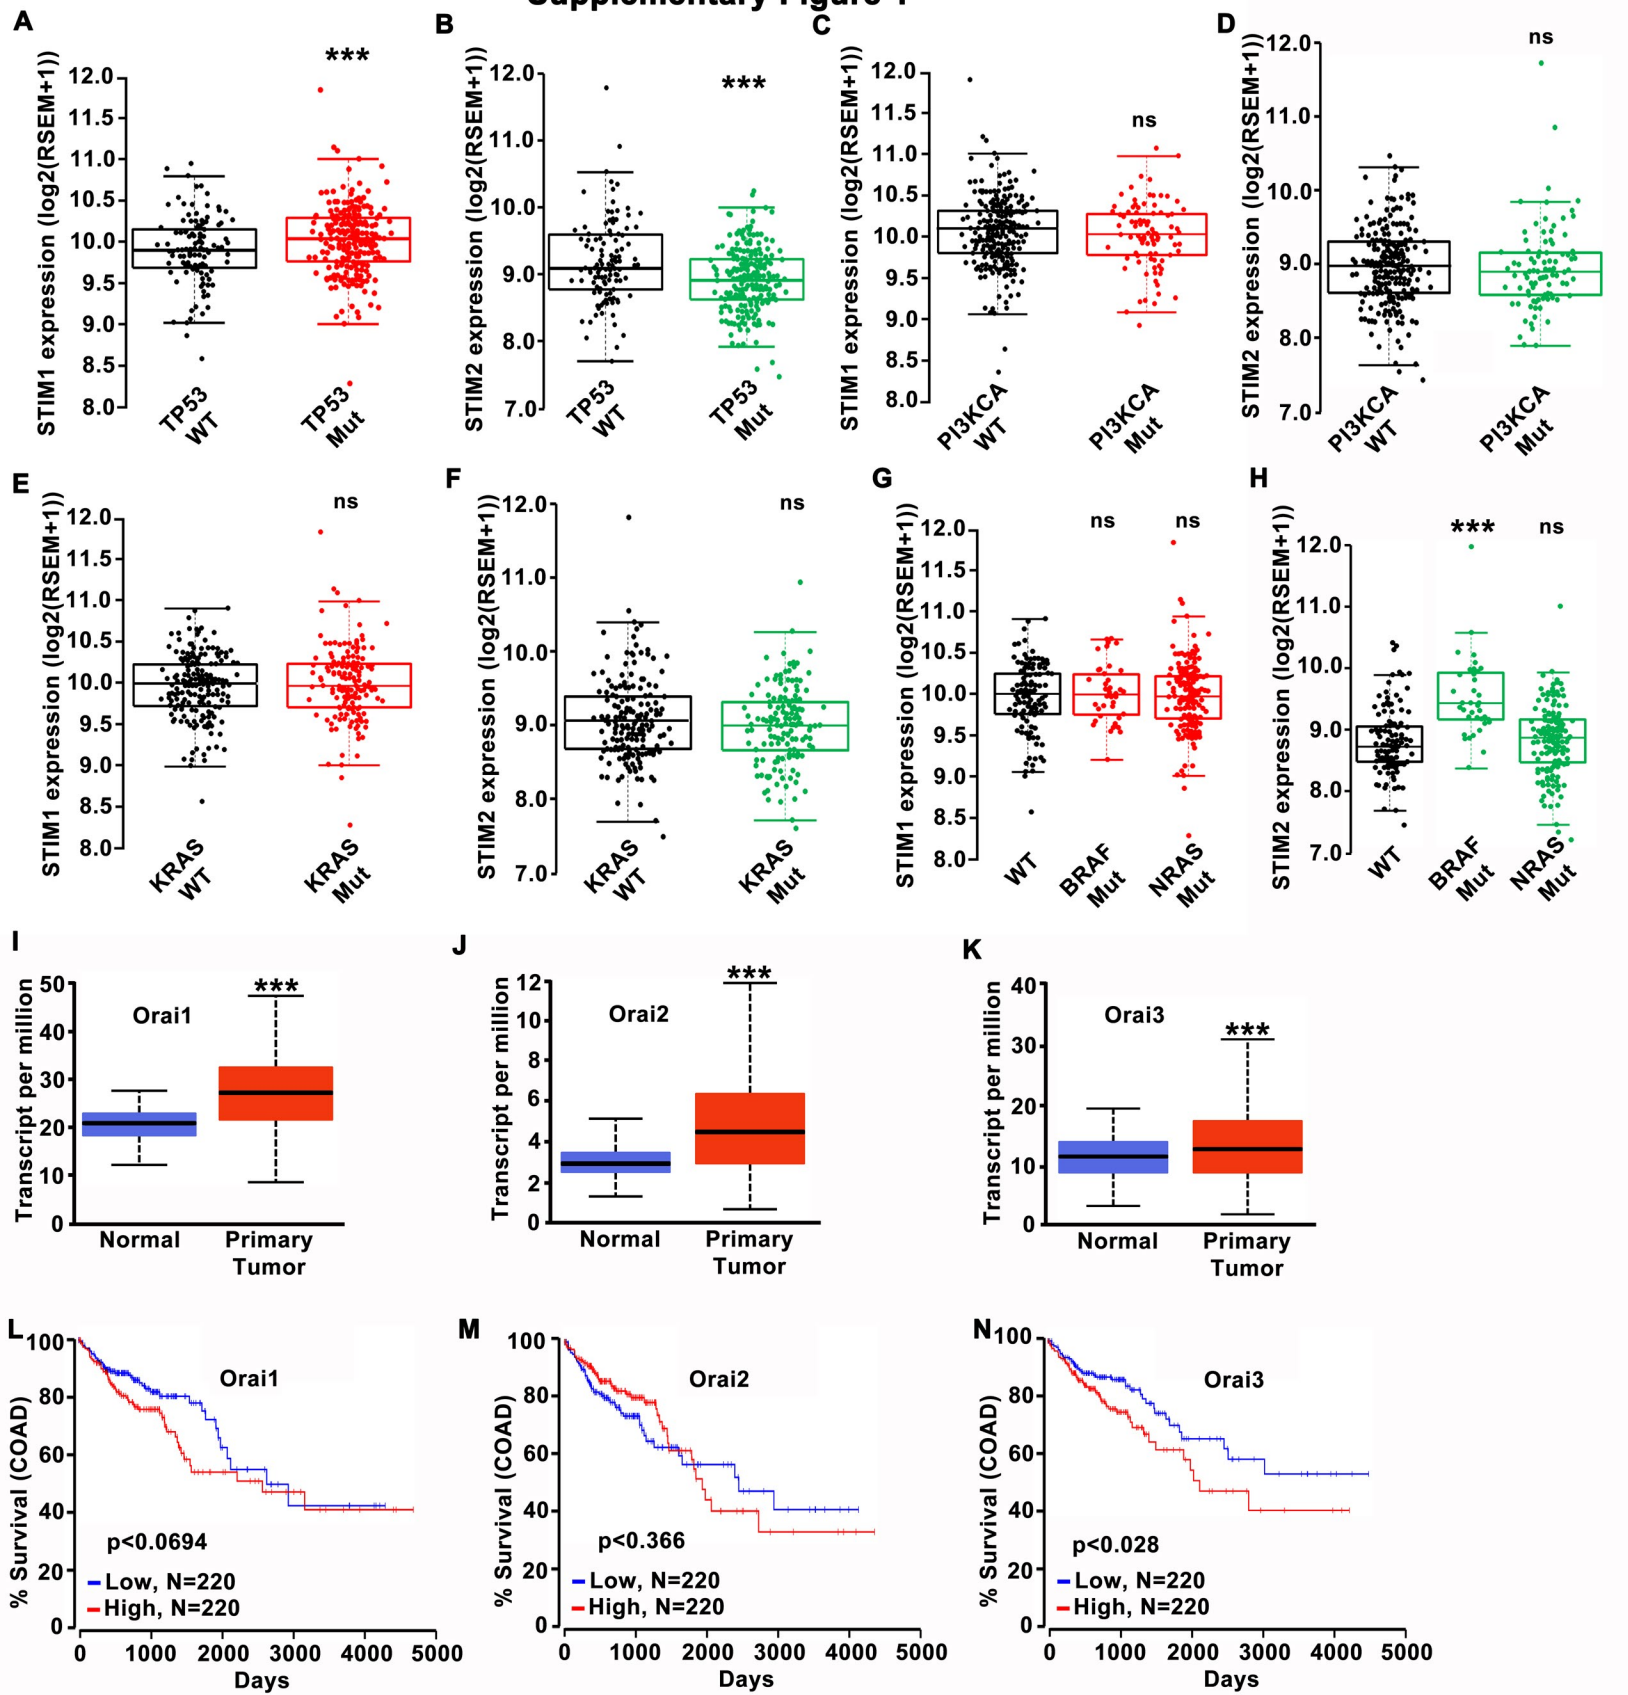

## Supplementary Figure 2

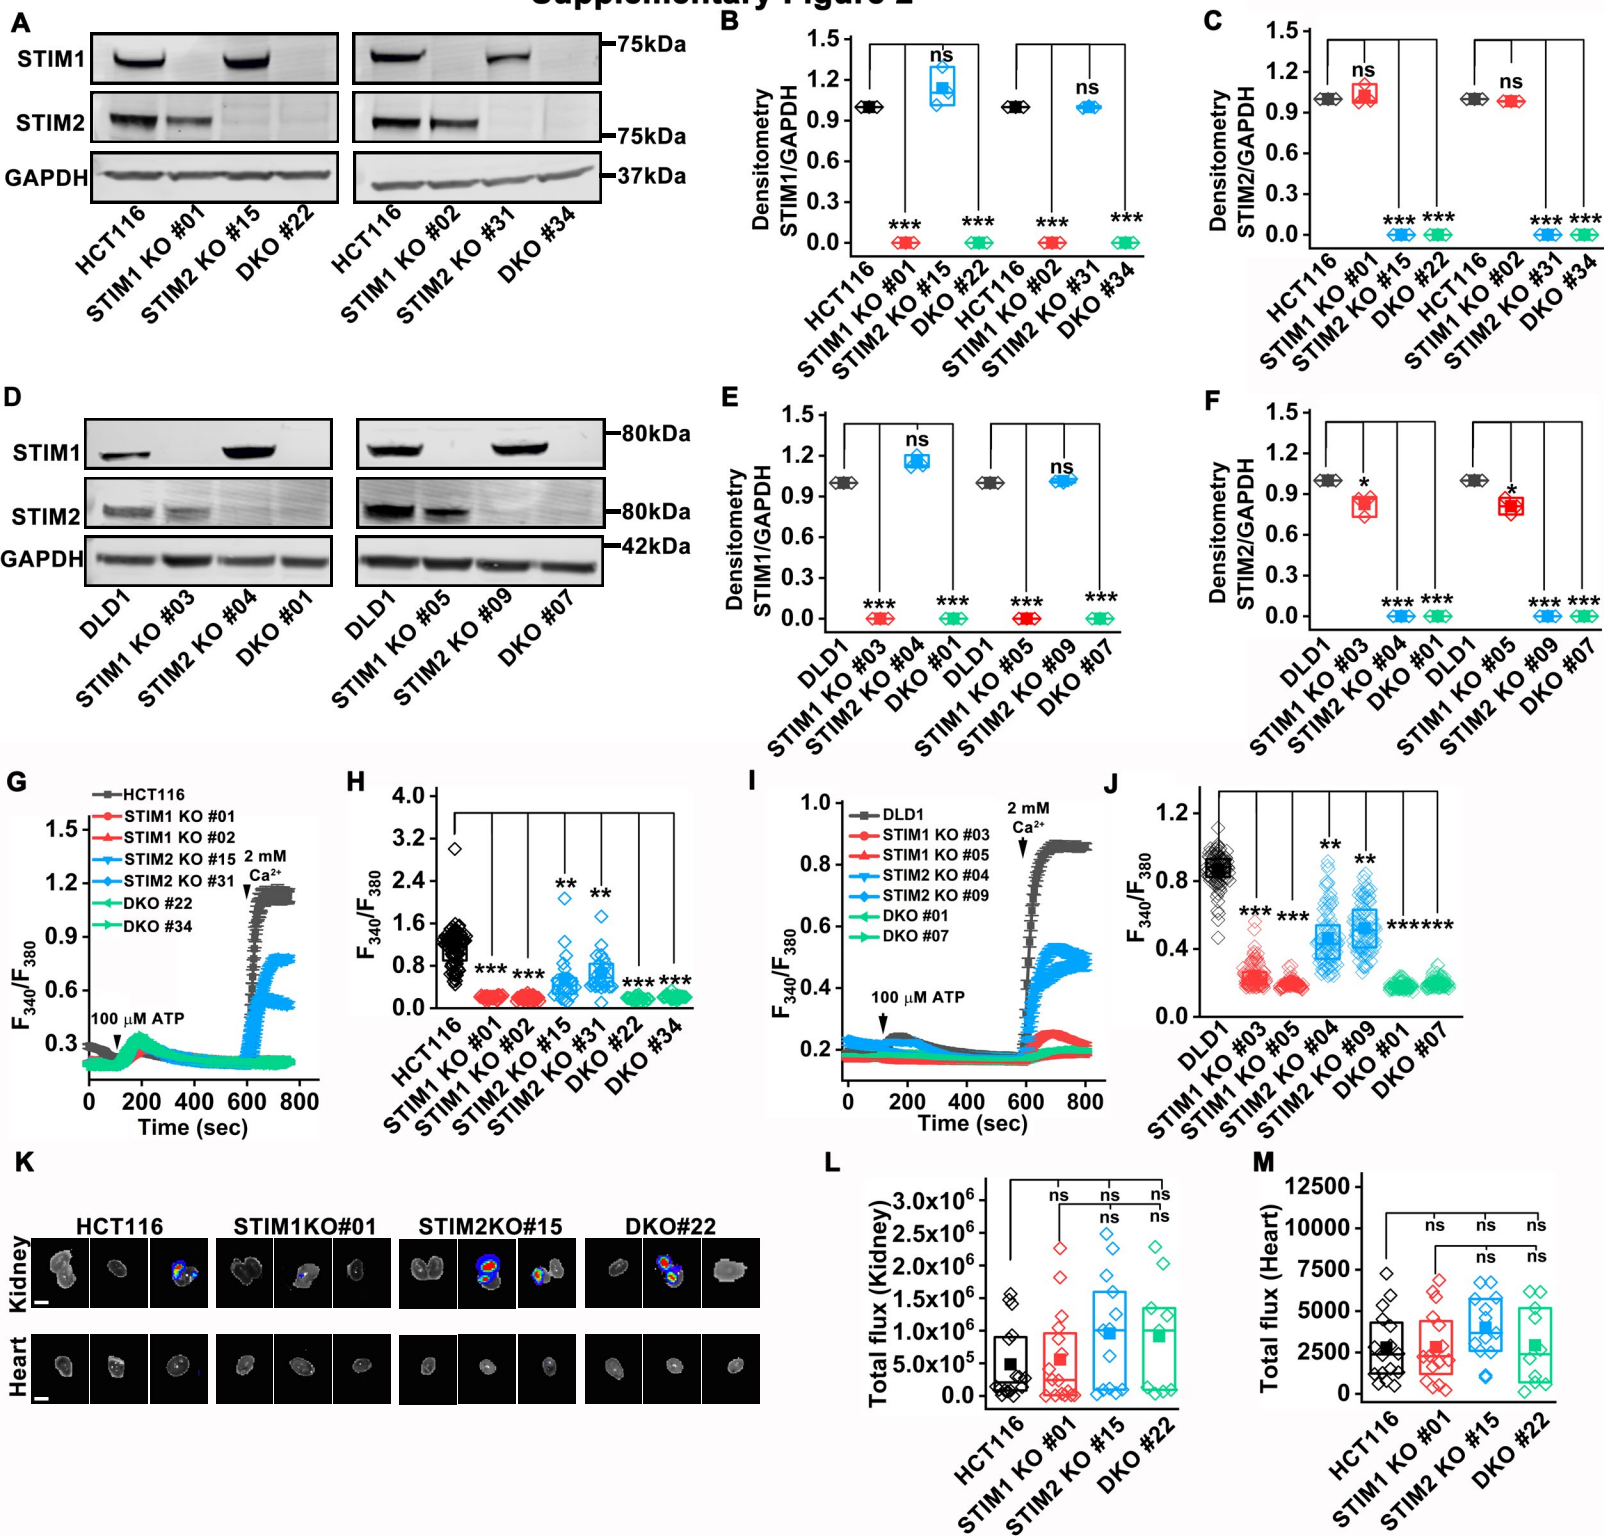

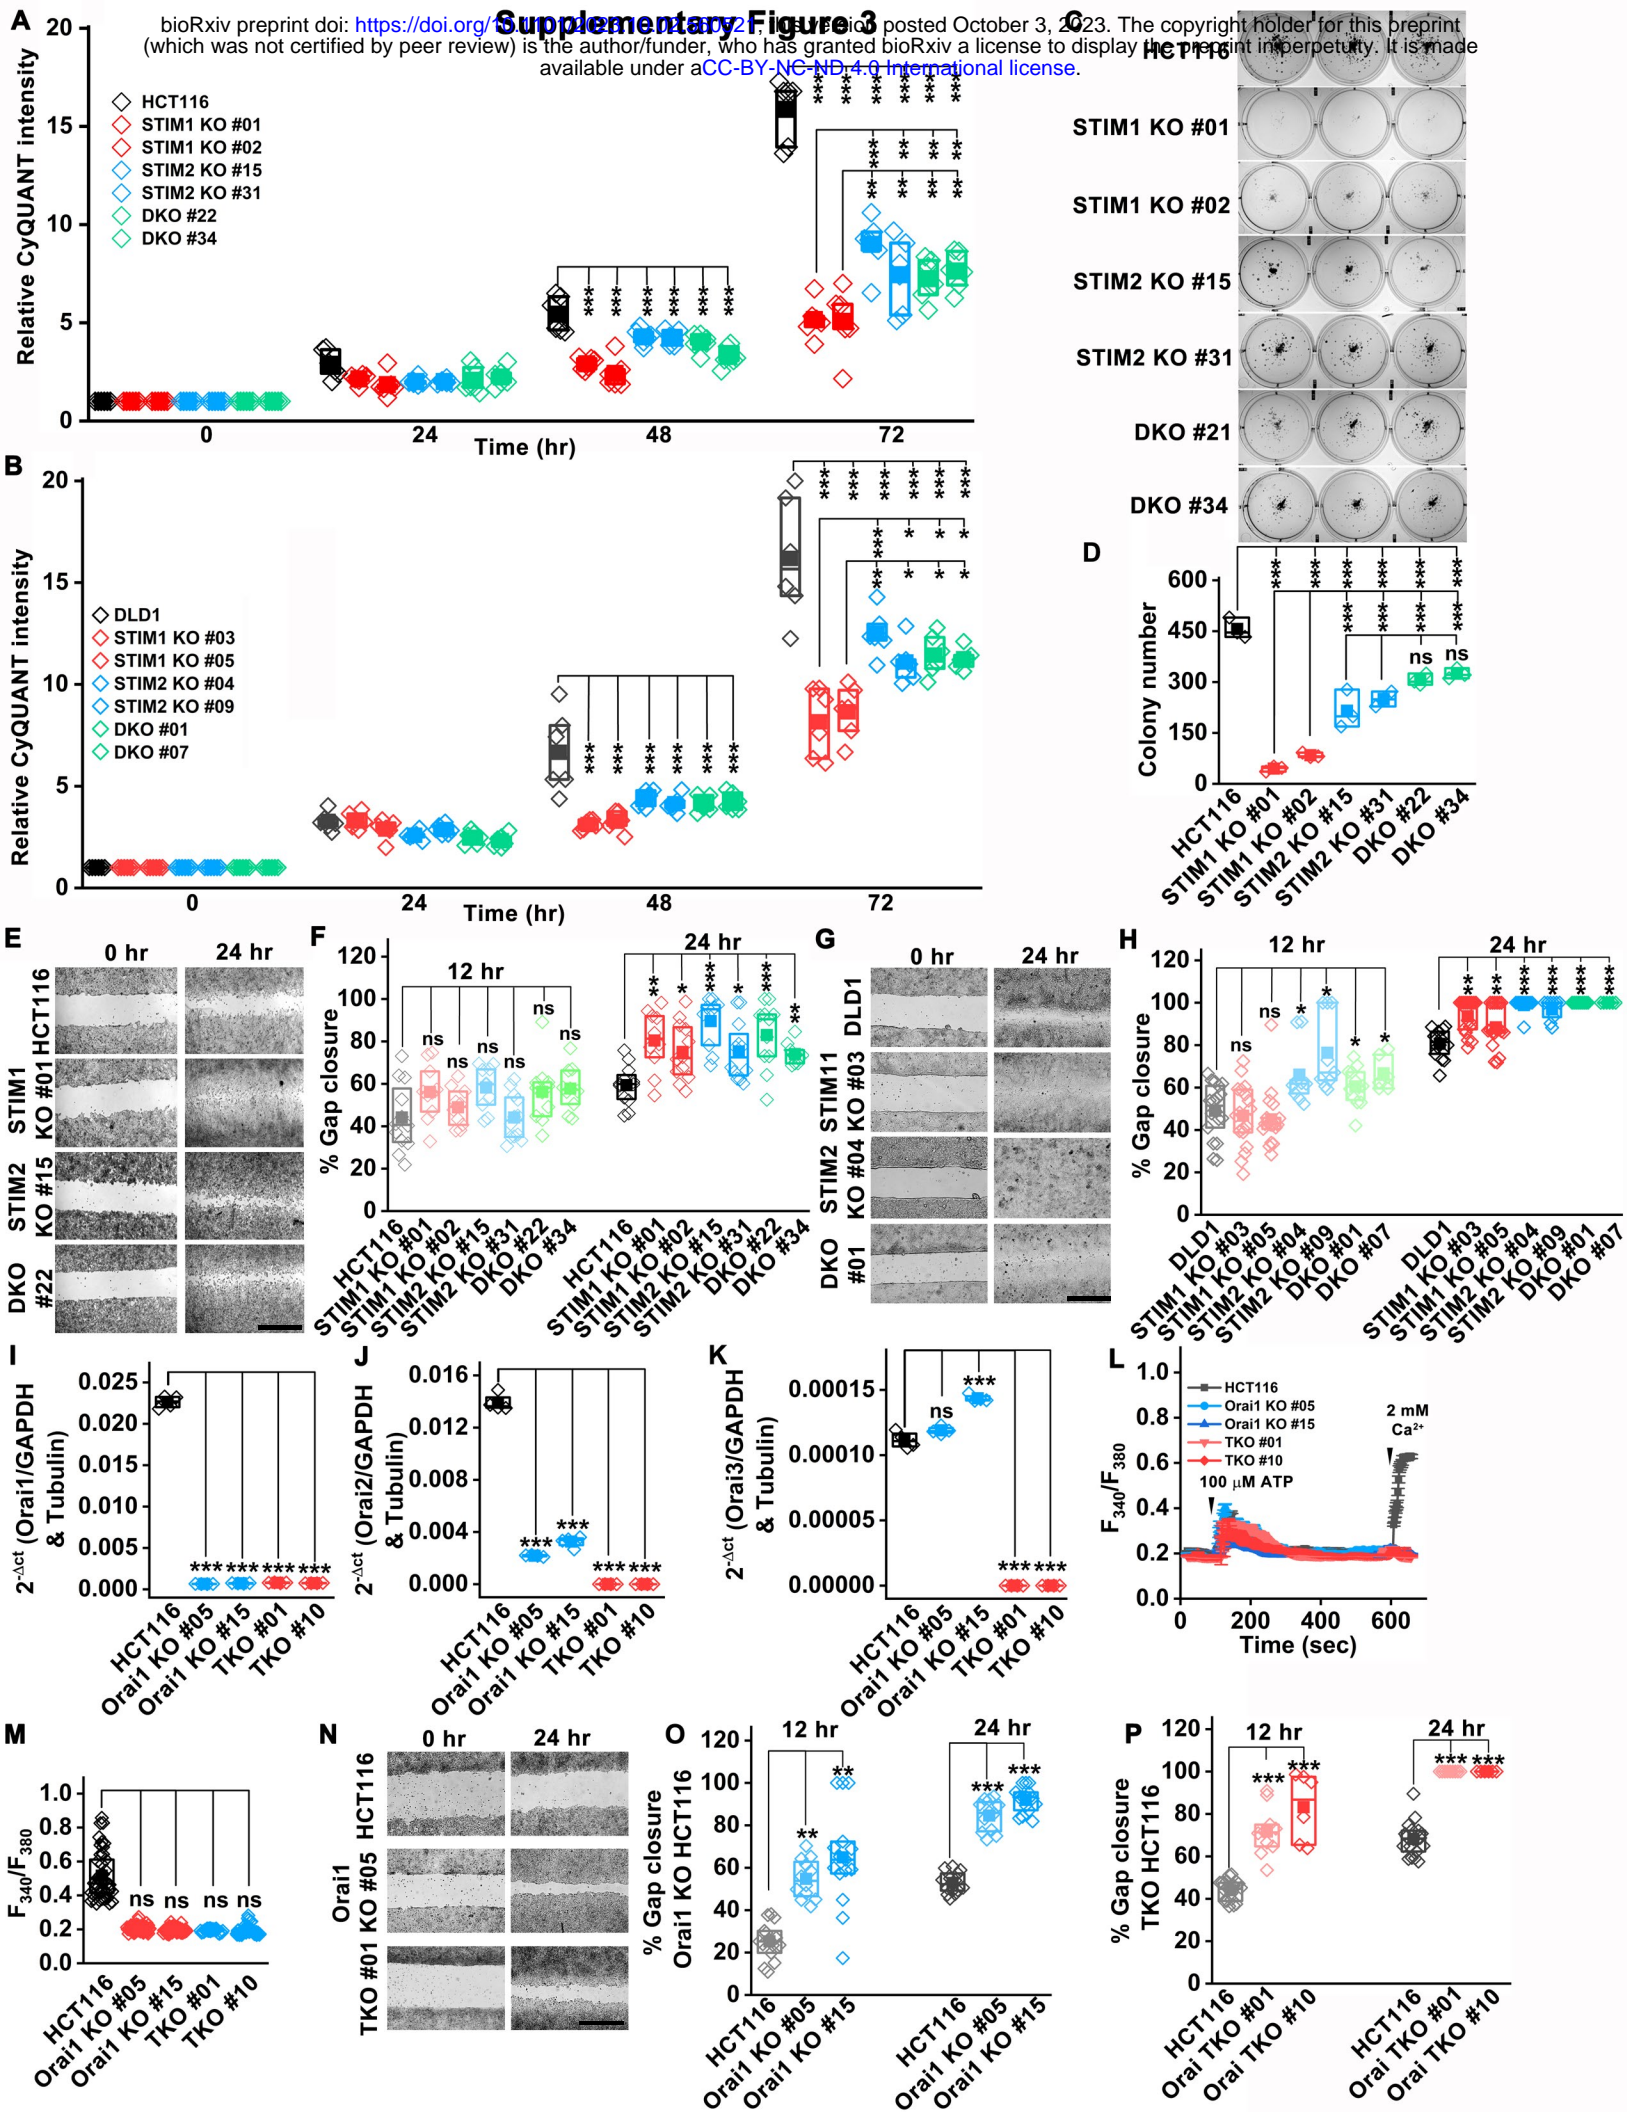

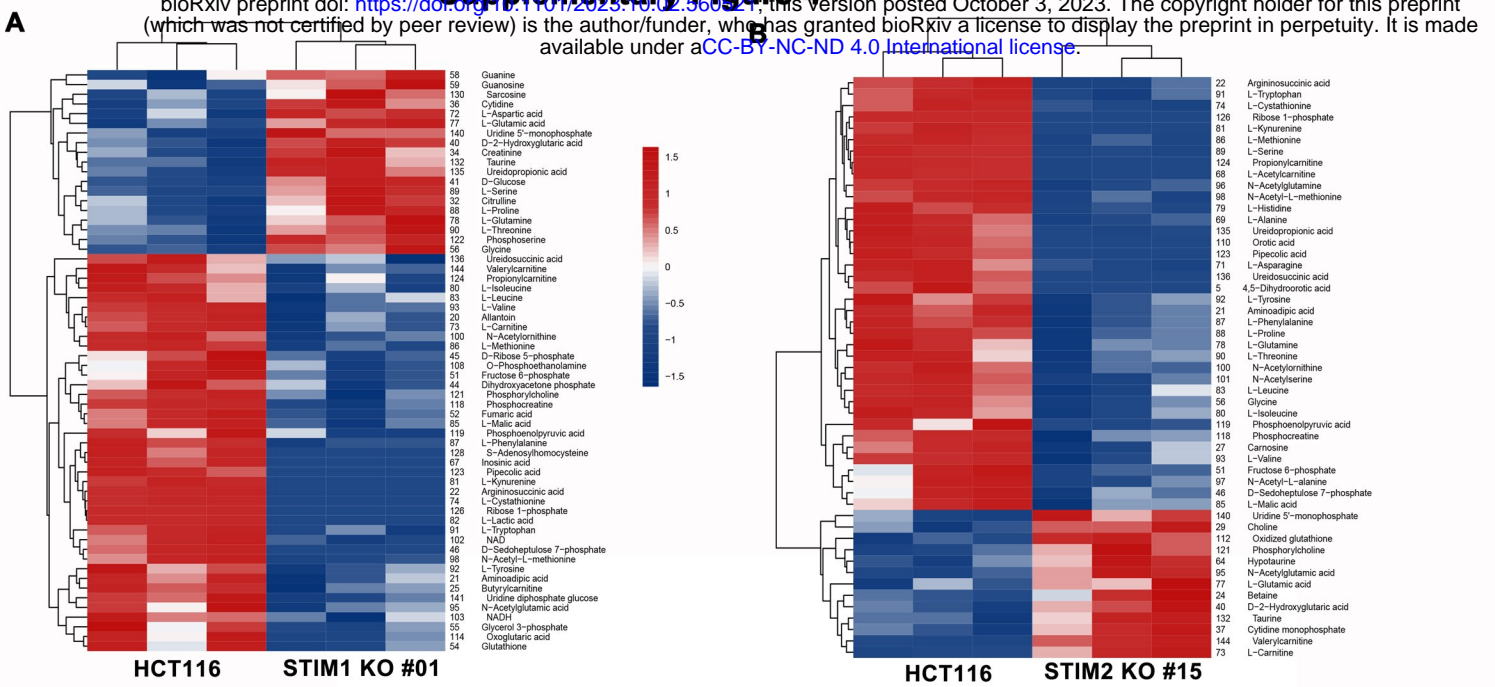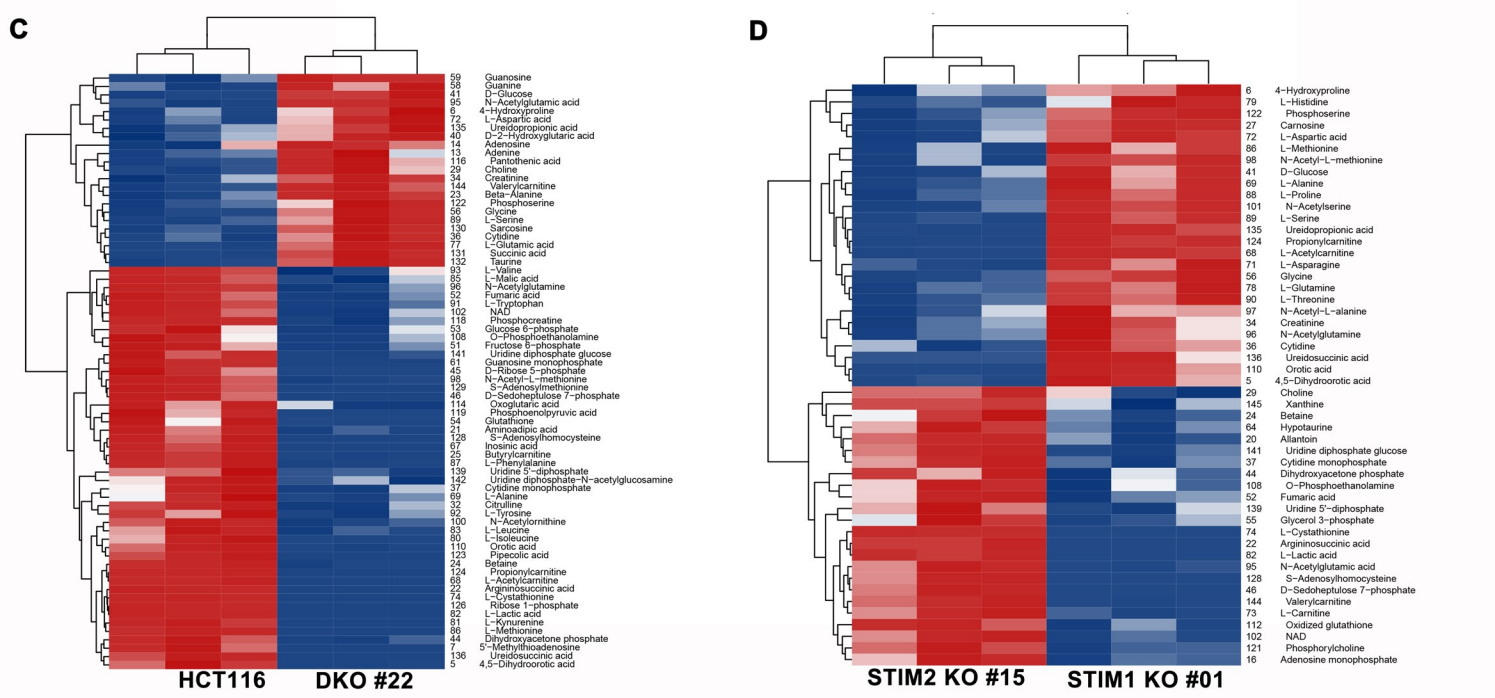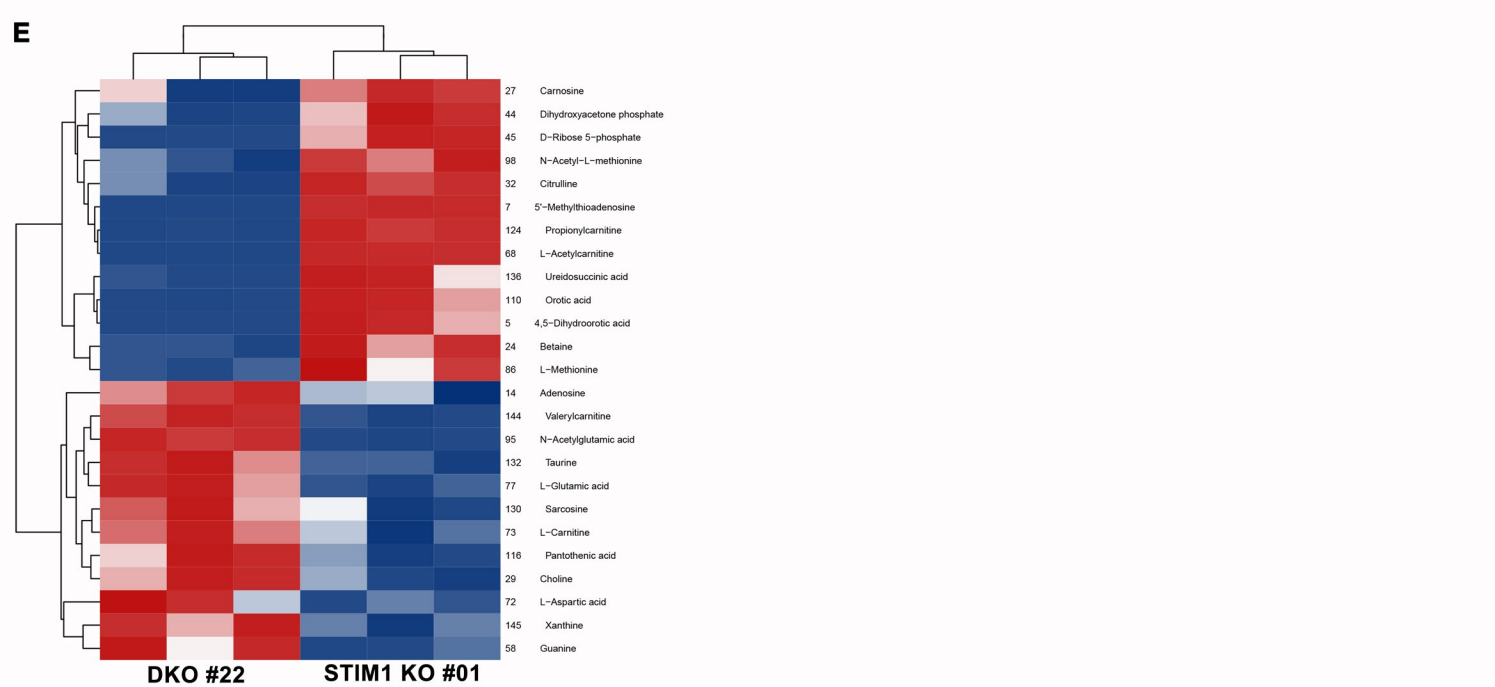

## Supplementary Figure 5

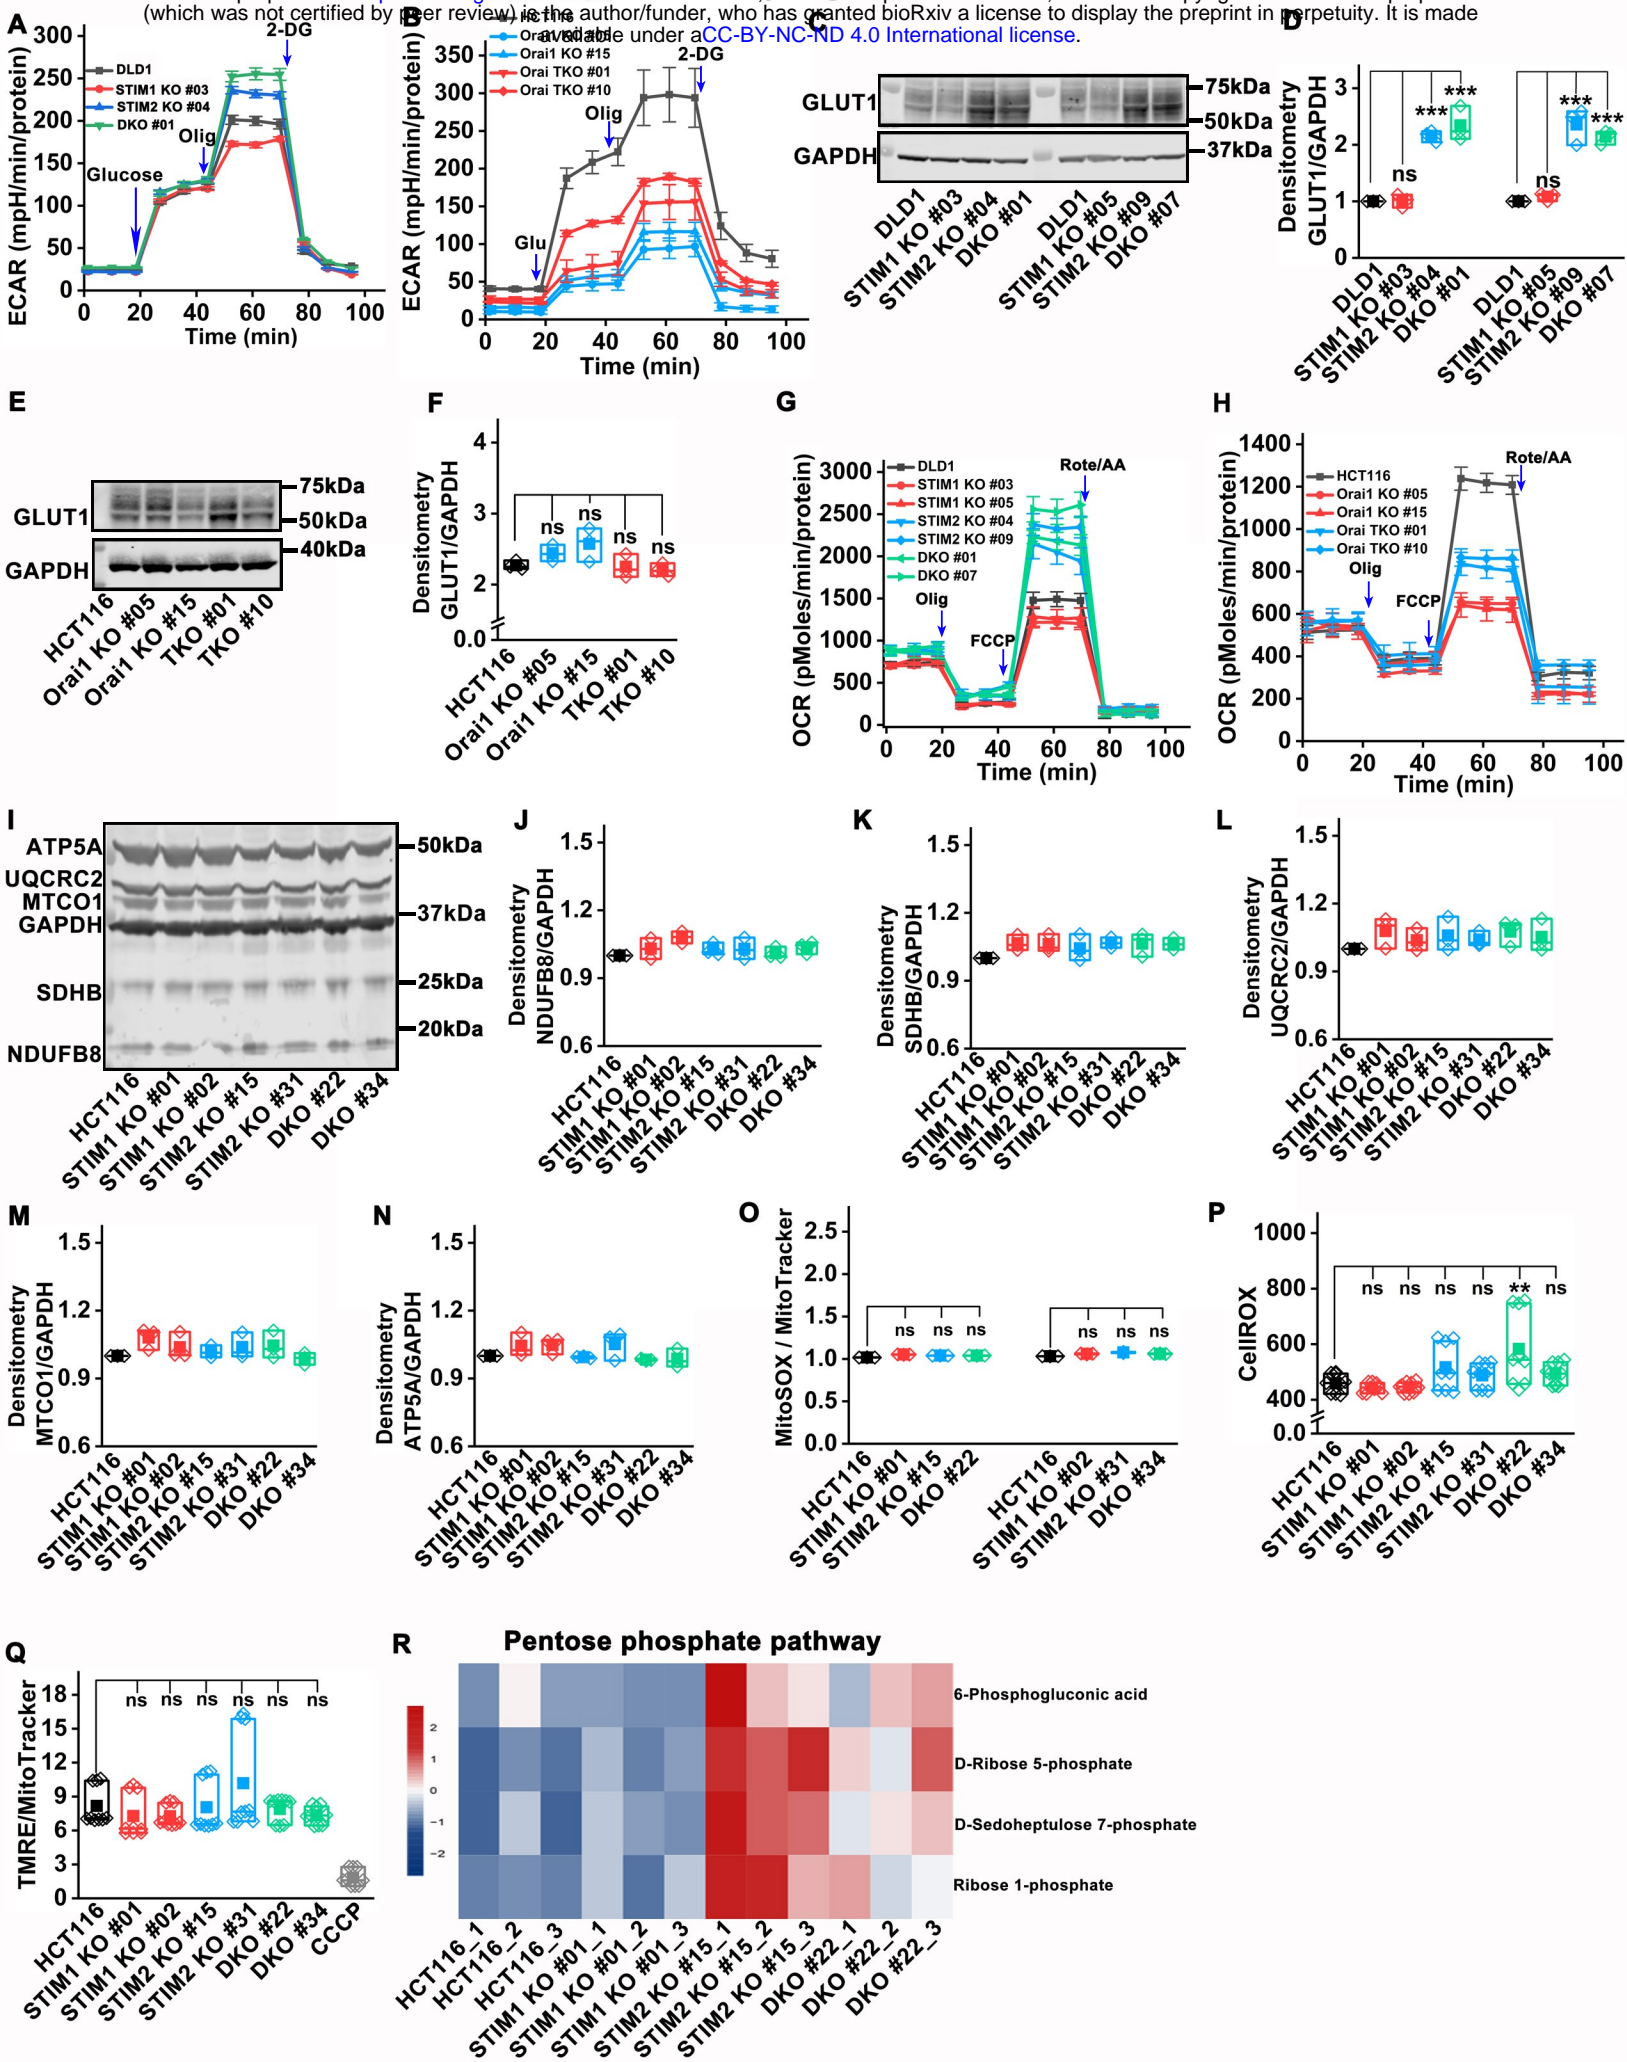

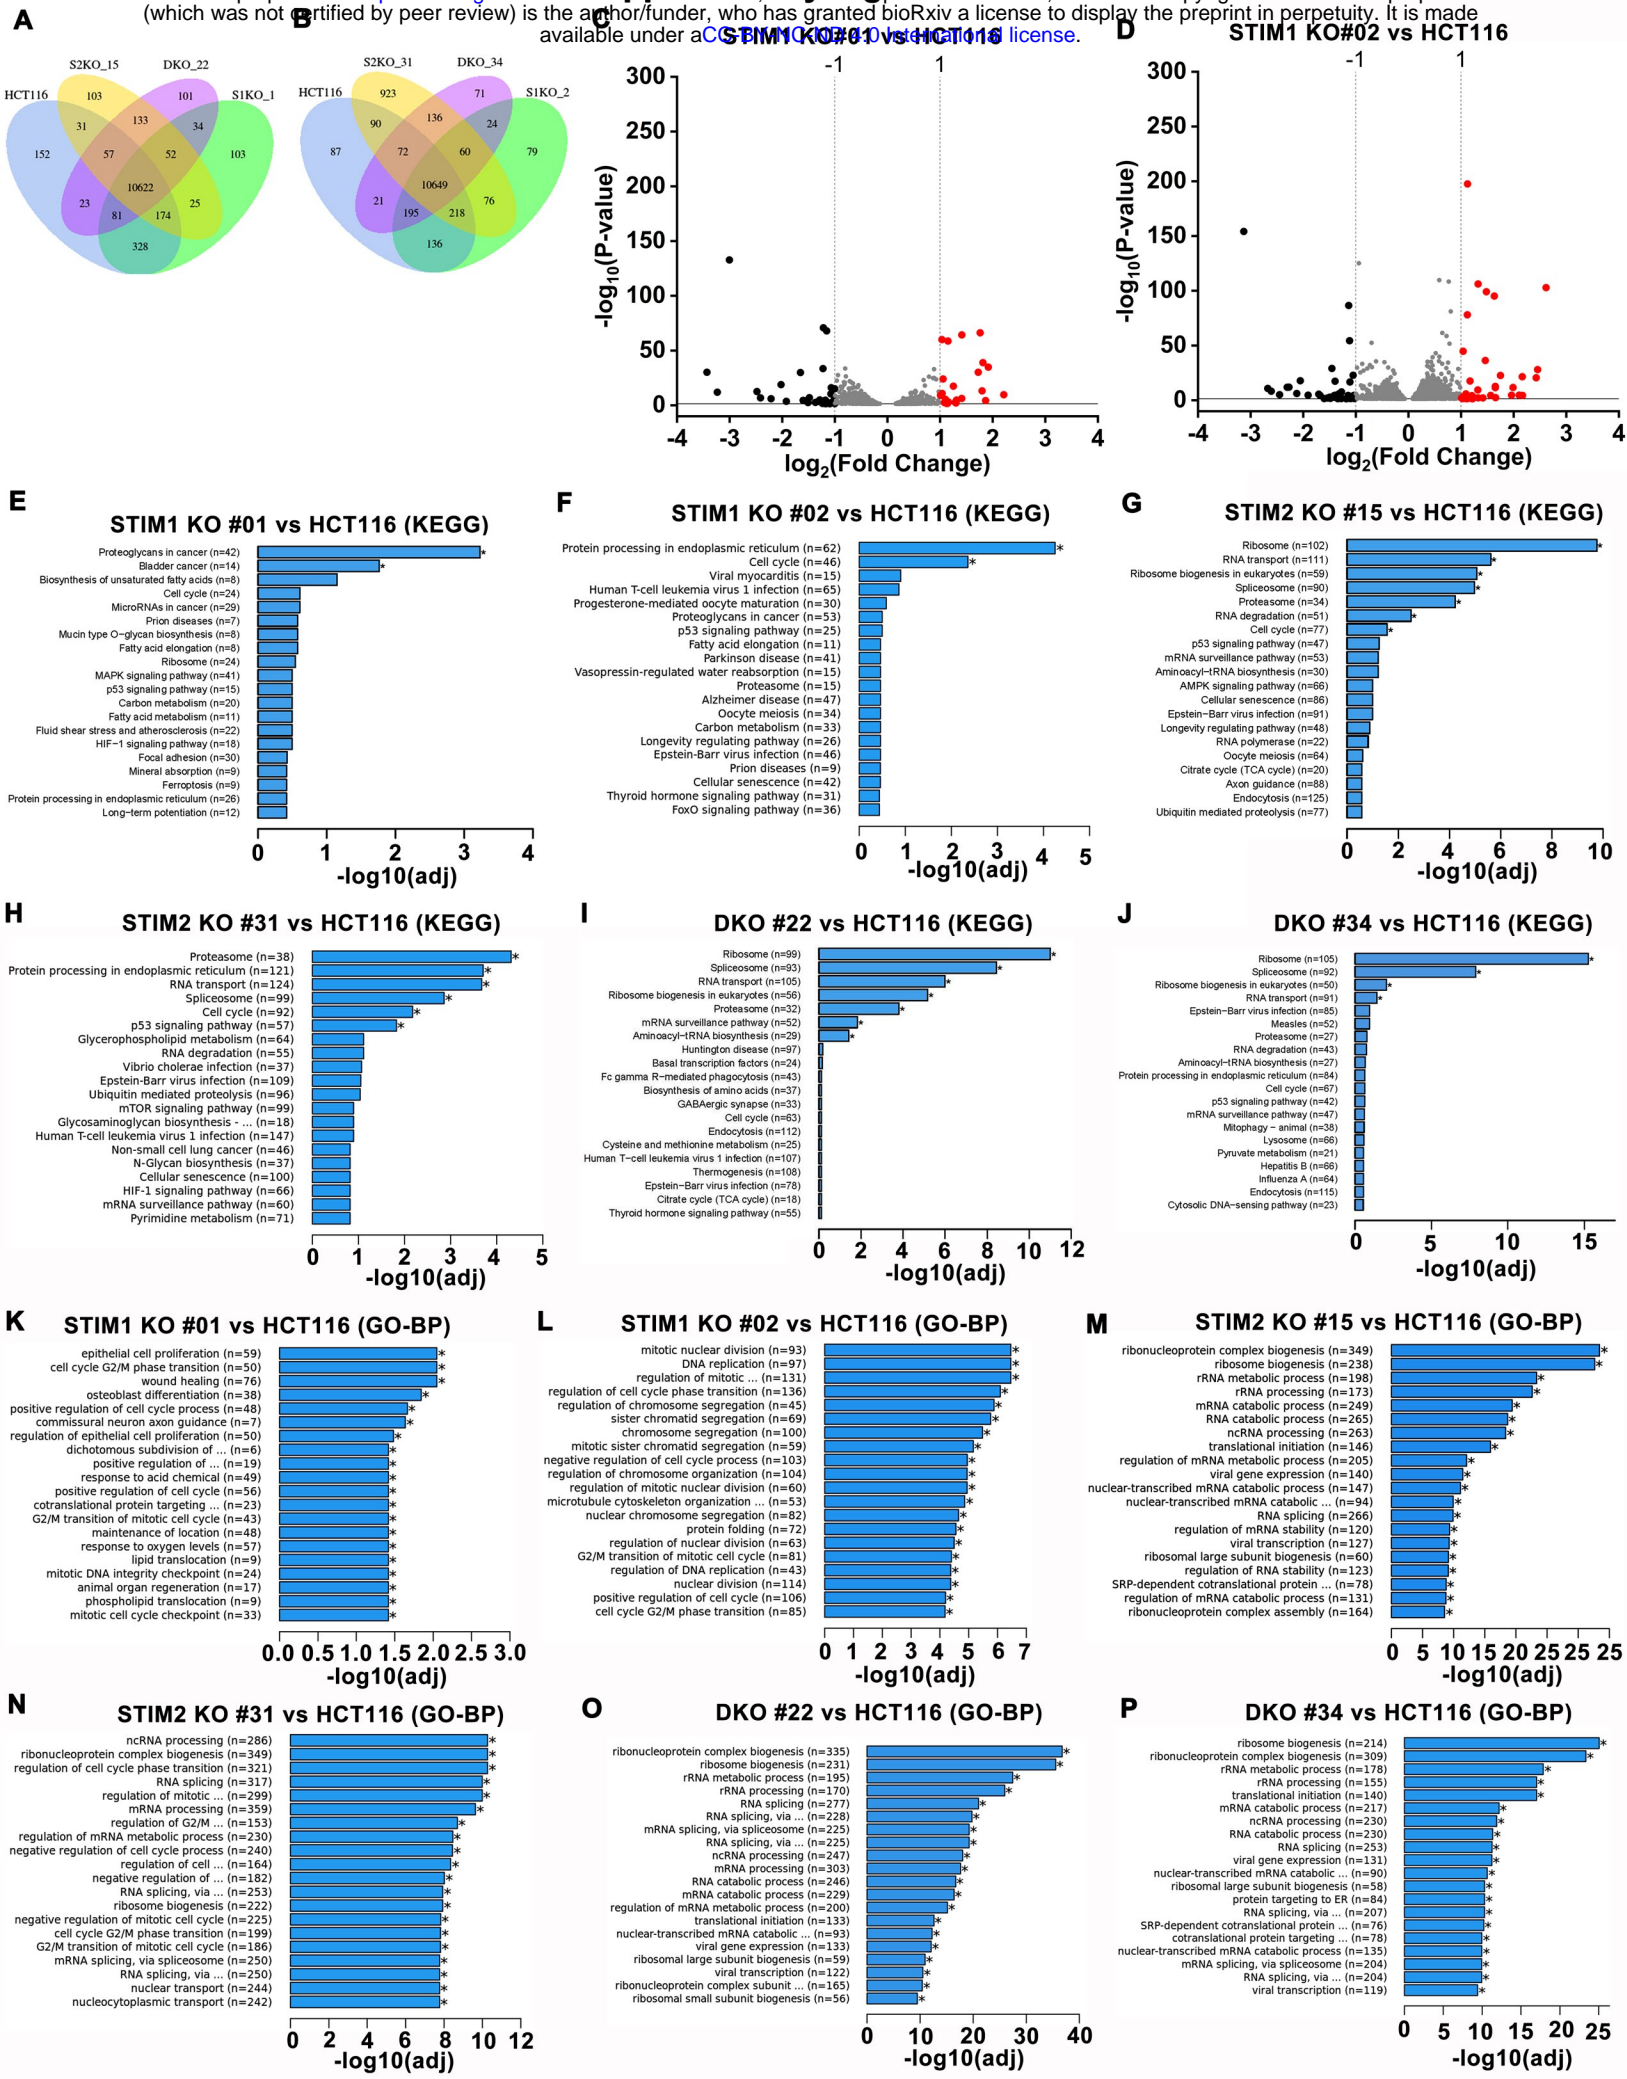

# Supplementary Figure 7

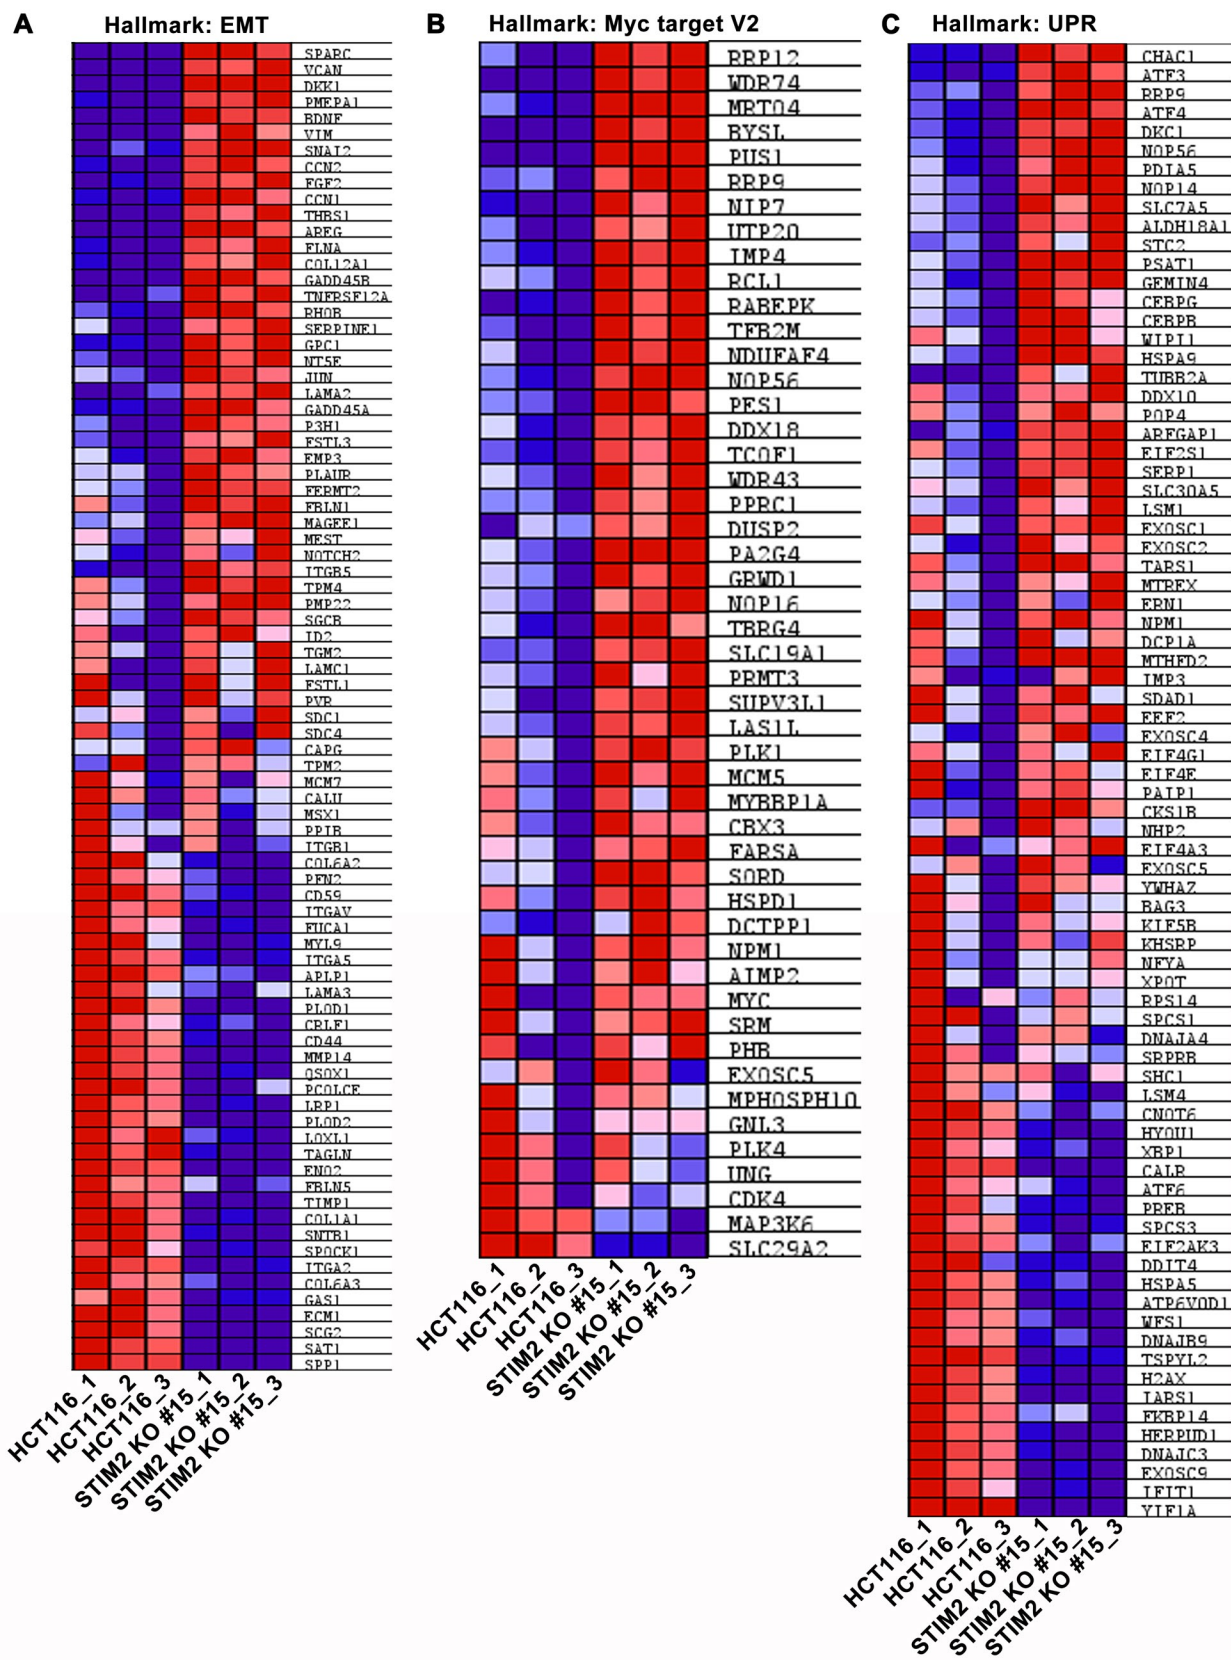

Supplementary Figure 8

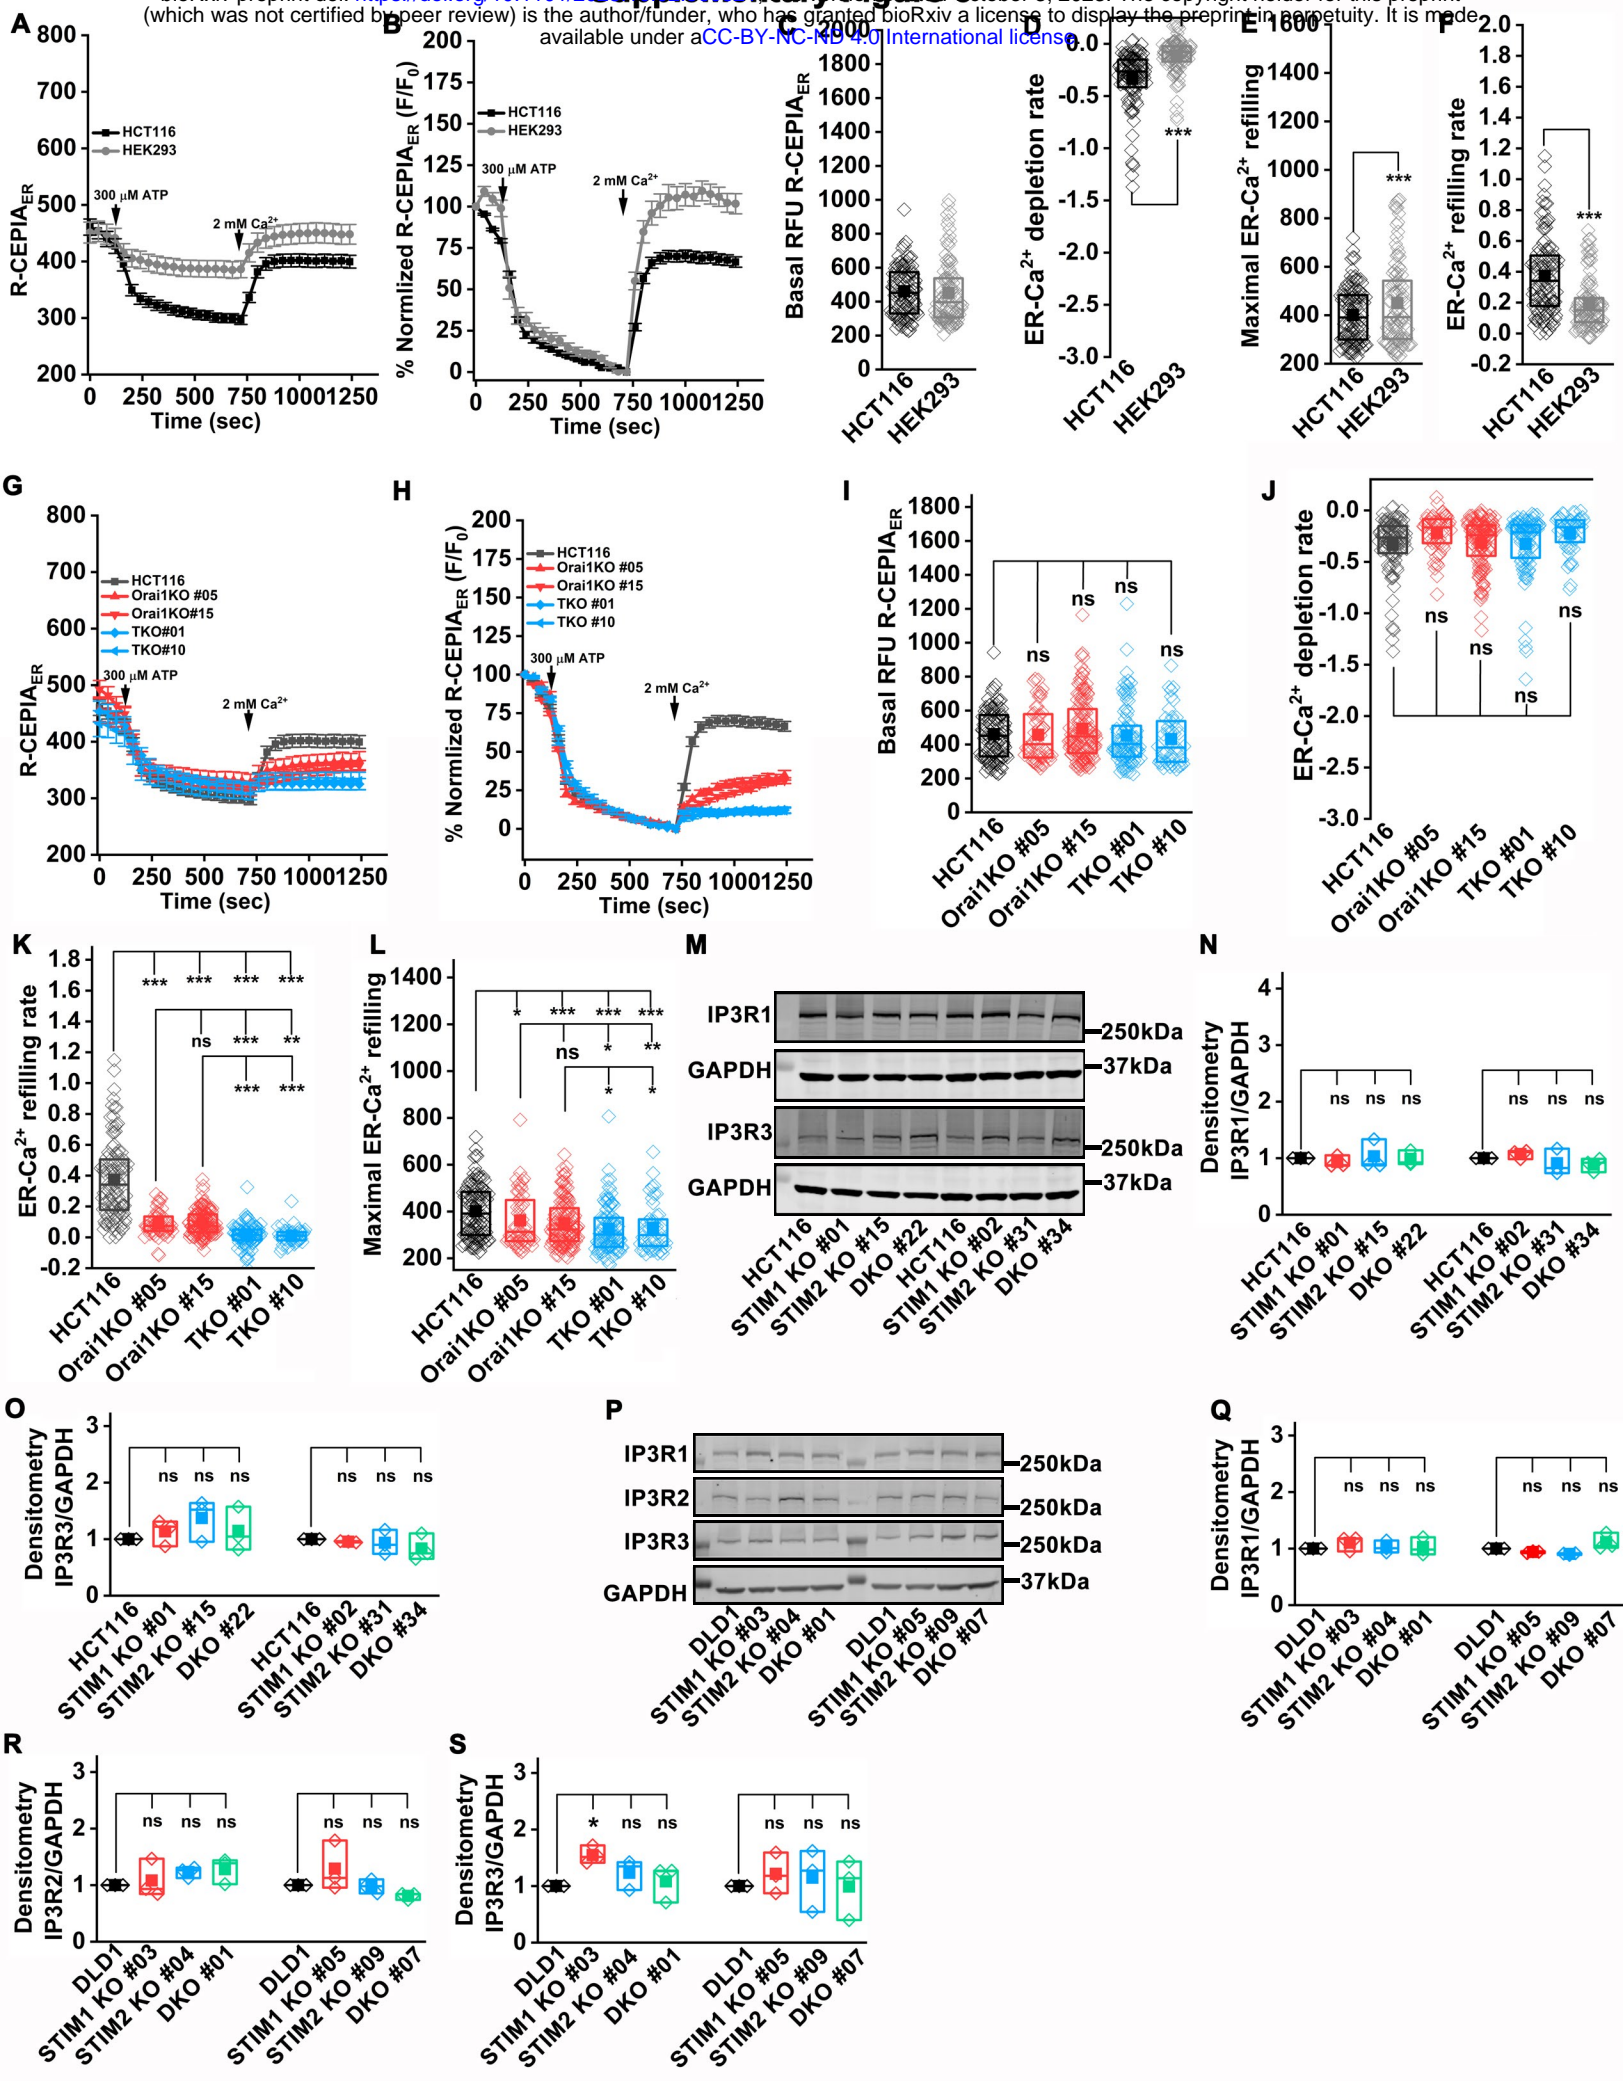



# Supplementary Figure 9

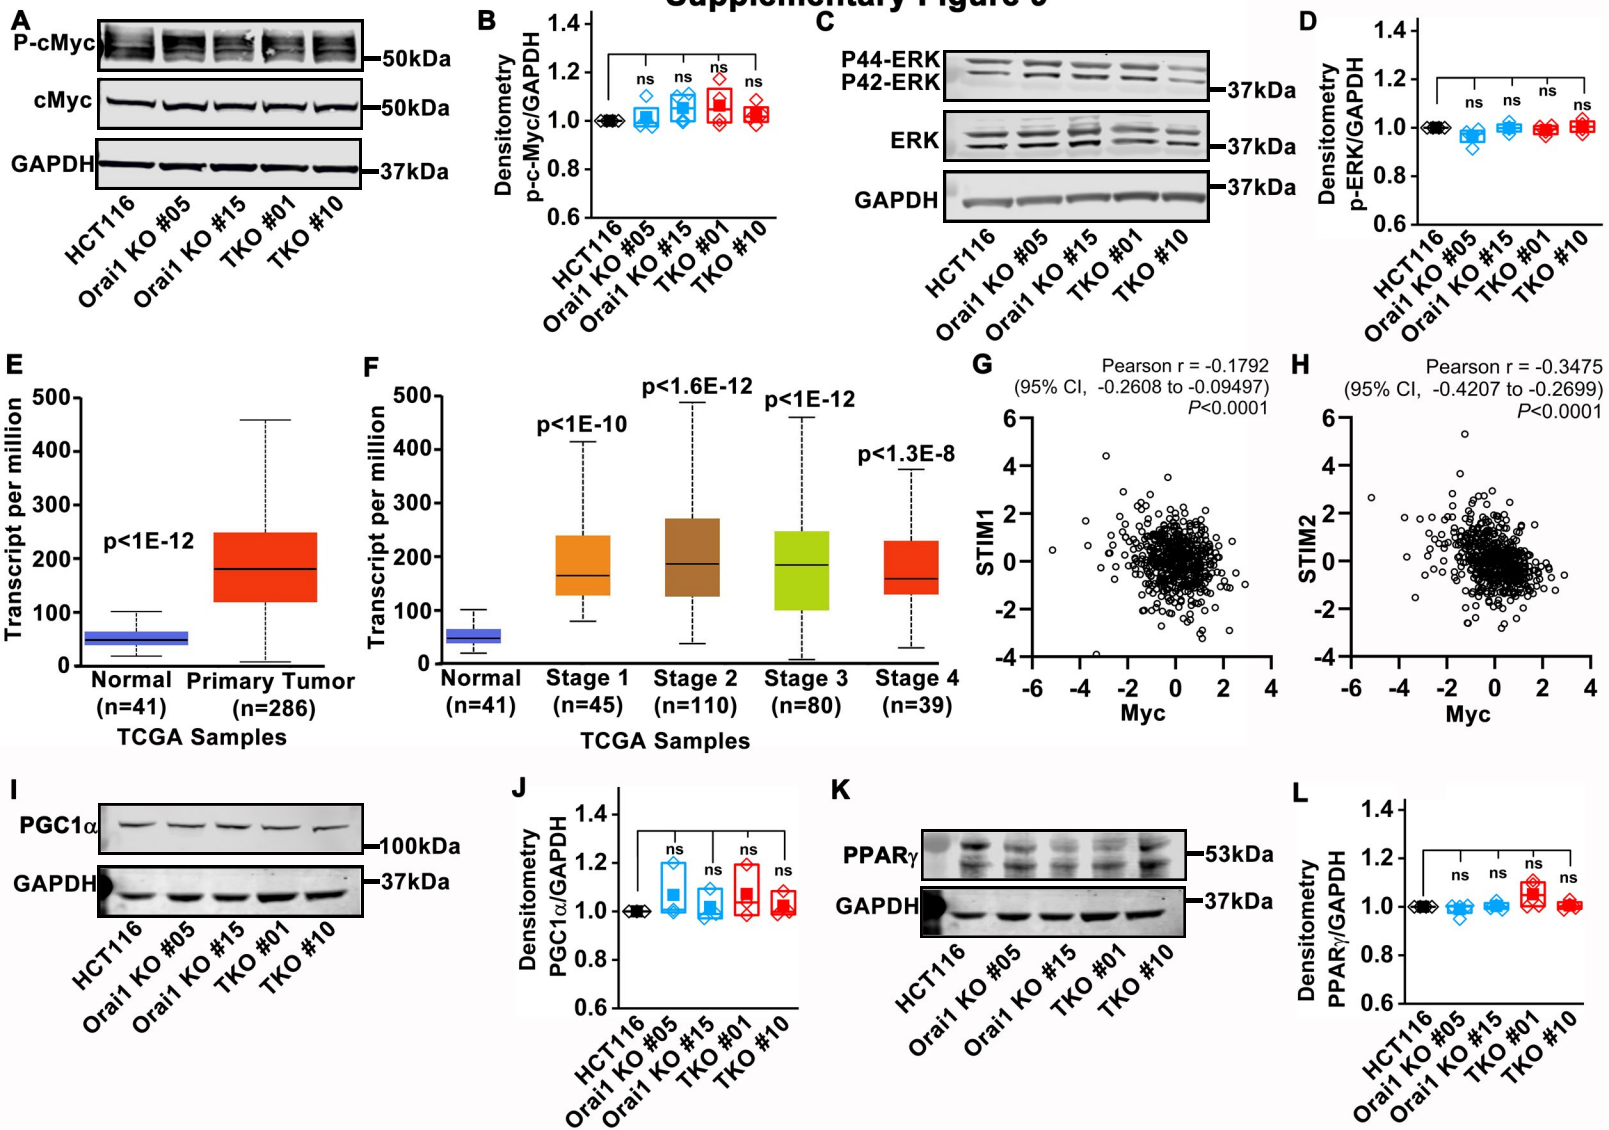

### Supplementary Figure 10

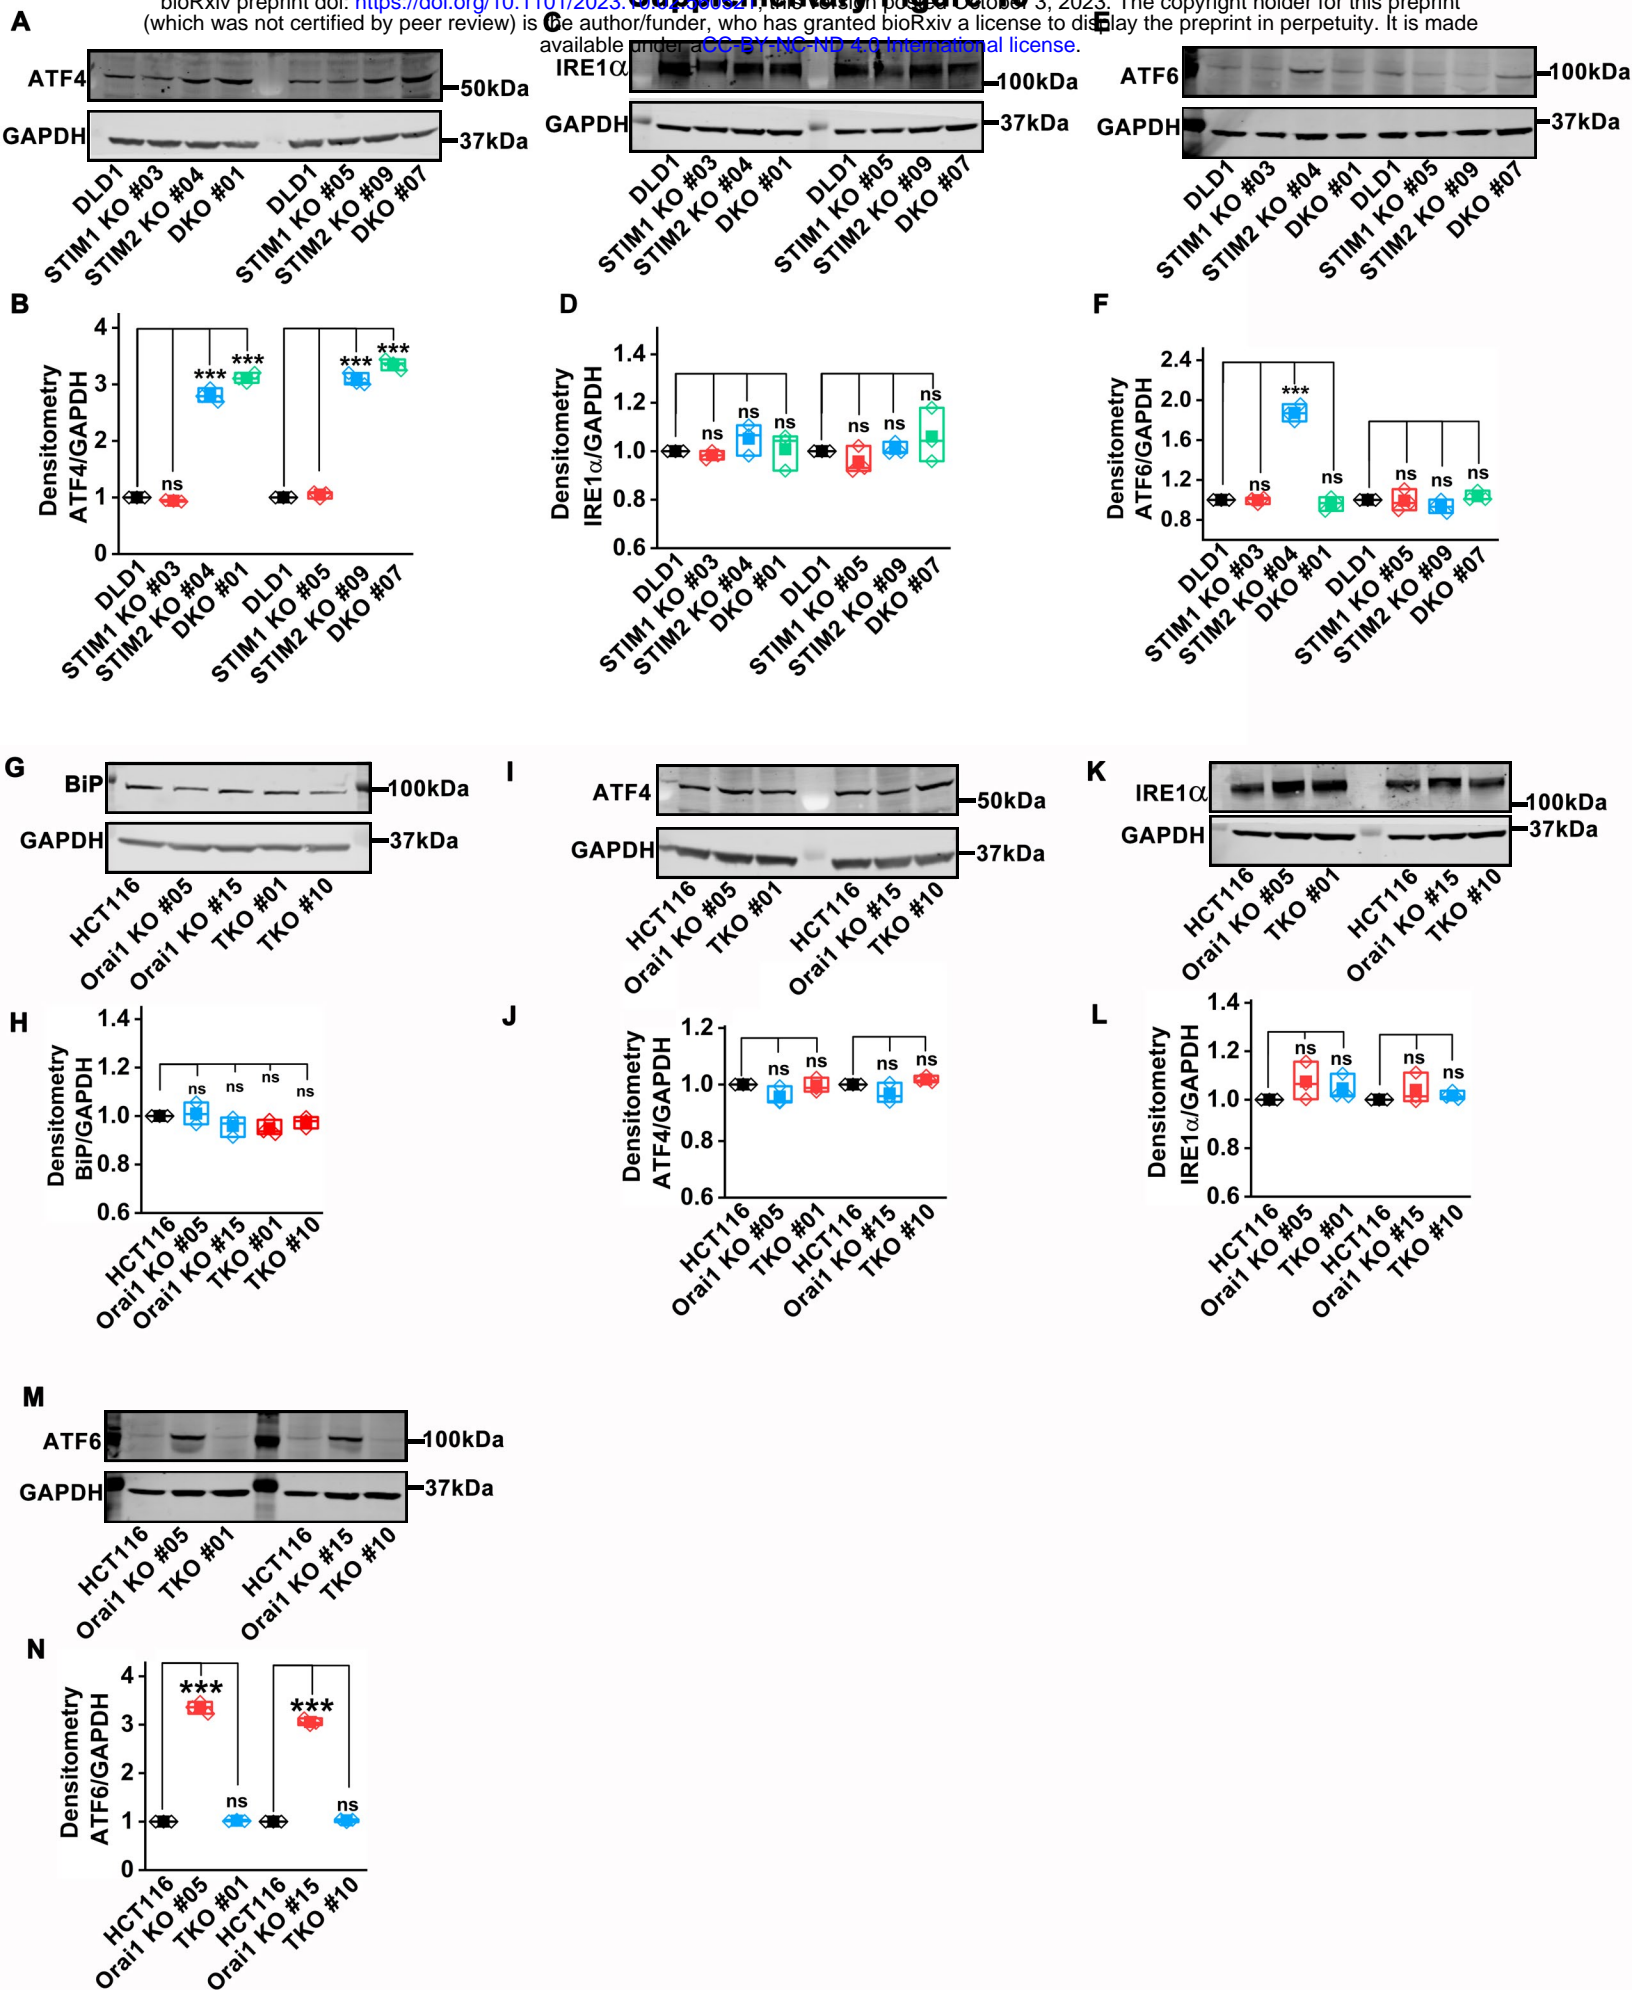

Supplement: NIHPP2023.10.02.560521V1-supplement-1.pdf [file NIHPP2023.10.02.560521V1-supplement-1.pdf]
